# Supplementary material for: The Lebanese Red Algae Jania rubens: Promising Biomolecules against Colon Cancer Cells
Source: MDPI journal article supplement (doi:10.3390/molecules27196617), 2022-10-05
Supplement: s1 [file s1]

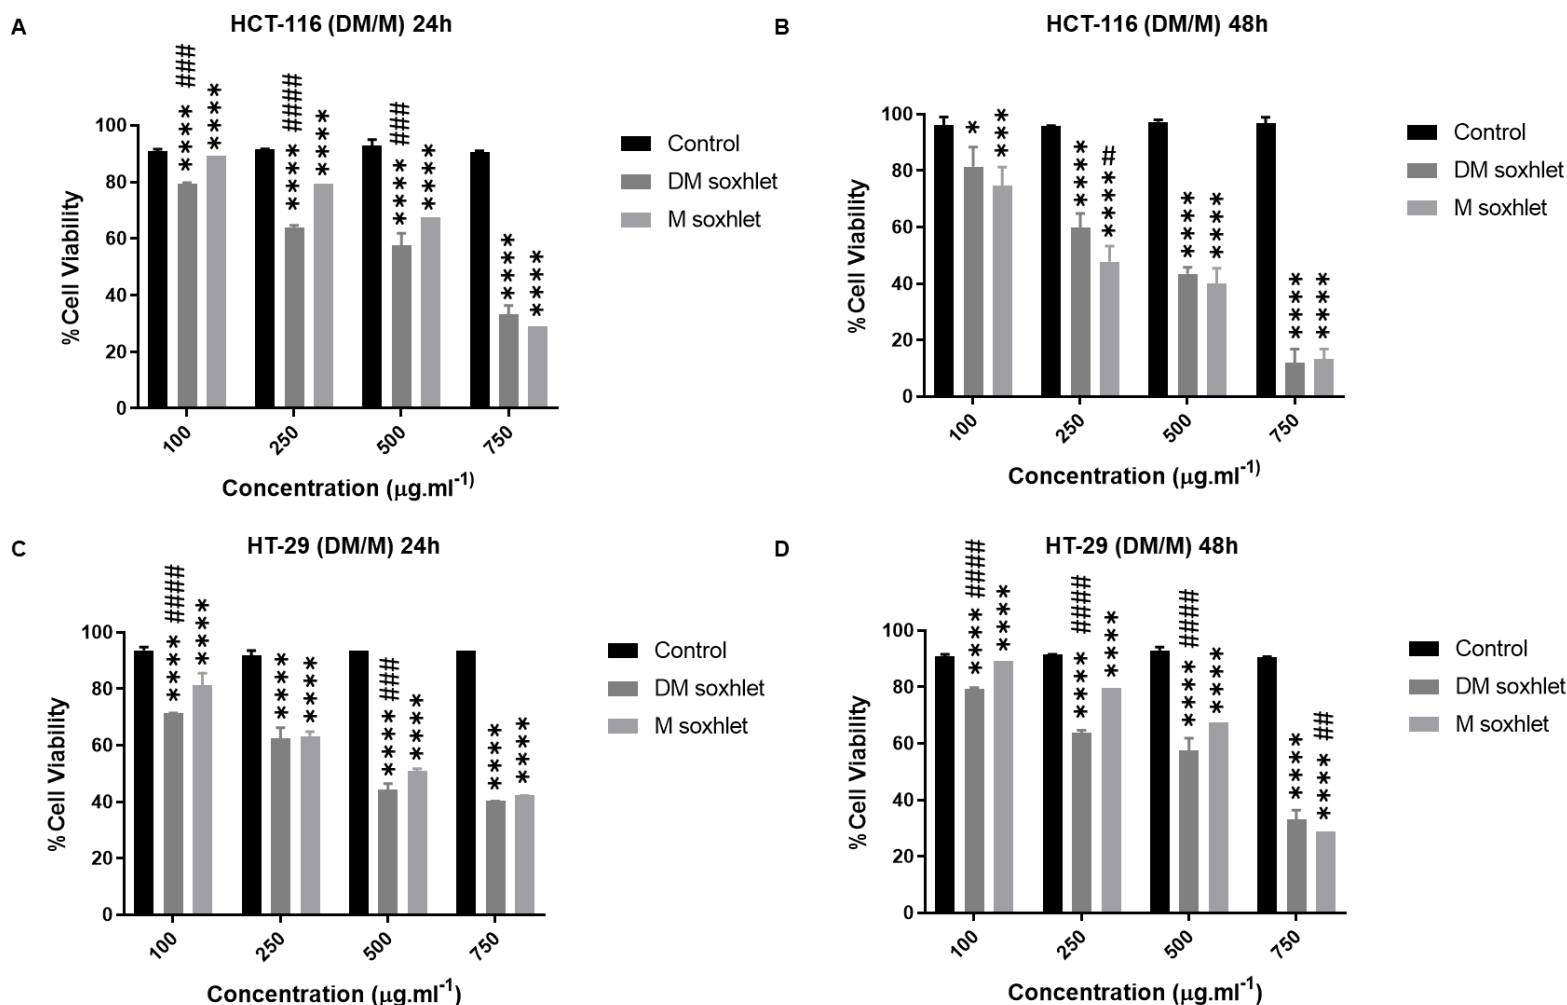

**Figure S1. Cytotoxic effect of *J. Rubens* DM and M crude extracts (100-250-500-750 μg.ml<sup>-1</sup>) on colon cancer cells using Trypan blue. (A, B) Effect on HCT-116 cells at 24h and 48h. (C, D) Effect on HT-29 cells at 24h and 48h. Results are present as the mean ± SD (n≥3). \*P<0.05 \*\*\*P<0.001 \*\*\*\*P<0.0001 vs control group. #P<0.05 ##P<0.01 ###P<0.001 ####P<0.0001 vs DM, Dichloromethane/methanol; M, methanol.**
